# Supplementary material
Source: HighWire-hosted journal article supplement (https://bmjopen.bmj.com/content/14/11/e085880)
Supplement: inline-supplementary-material-7 [file inline-supplementary-material-7.pdf]

Version: 27-02-2024

Supplementary material 7. Overview of score matrix of data set

| CATEGORIES                       | LABEL LEVEL 1                           | LABEL LEVEL 2                                                                  | VALUE                                                                                                                                  |
|----------------------------------|-----------------------------------------|--------------------------------------------------------------------------------|----------------------------------------------------------------------------------------------------------------------------------------|
| ARTICLES FOR FULL-TEXT SCREENING |                                         |                                                                                |                                                                                                                                        |
|                                  | No.                                     |                                                                                | Number Endnote database                                                                                                                |
|                                  | Articles                                |                                                                                | Author(s). Year of publication (YYYY) Title of article. Abbreviated title of journal, volume number (issue number), page numbers. DOI. |
|                                  | Group 1 - Value-Based Healthcare        | implementation of VBHC strategies                                              | 1 = yes OR ' ' = no                                                                                                                    |
|                                  |                                         | application of VBHC-components                                                 | 1 = yes OR ' ' = no                                                                                                                    |
|                                  | Group 2 - Military patient care pathway | acute/trauma care in military operations (operational)                         | 1 = yes OR ' ' = no                                                                                                                    |
|                                  |                                         | definitive healthcare / rehabilitation (post-operational)                      | 1 = yes OR ' ' = no                                                                                                                    |
|                                  | Medical grouping                        |                                                                                | Group 1 OR Group 2 OR Group 1 & 2                                                                                                      |
|                                  | Remarks                                 |                                                                                | Text                                                                                                                                   |
| VALUE-BASED HEALTHCARE           |                                         |                                                                                |                                                                                                                                        |
|                                  | Implementation of VBHC strategies       | implementing a system using multiple VBHC components                           | number of components (≥2: positive probability of success)                                                                             |
|                                  |                                         | improving value for the patient by transformation/change of the current system | exploratory text                                                                                                                       |
|                                  | Application of VBHC-components          | Integrated Practice Units                                                      | x = no application OR text = applied component                                                                                         |
|                                  |                                         | Measure outcomes and costs for every patient                                   | x = no application OR text = applied component                                                                                         |
|                                  |                                         | Move to bundled payments for care cycles                                       | x = no application OR text = applied component                                                                                         |
|                                  |                                         | integrate care delivery across separate facilities                             | x = no application OR text = applied component                                                                                         |
|                                  |                                         | Expand excellent services across geography                                     | x = no application OR text = applied component                                                                                         |
|                                  |                                         | Build an enabling information technology platform                              | x = no application OR text = applied component                                                                                         |
|                                  |                                         | patient-centred care/shared decision making                                    | x = no application OR text = applied component                                                                                         |
|                                  | Remarks                                 | remarks, additional information                                                | Text                                                                                                                                   |
| CLINICAL / MEDICAL               |                                         |                                                                                |                                                                                                                                        |
|                                  | Year                                    |                                                                                | years                                                                                                                                  |
|                                  | Country                                 |                                                                                | text                                                                                                                                   |
|                                  | Center/ Program                         |                                                                                | text                                                                                                                                   |
|                                  | Main outcomes vbhc                      |                                                                                | description                                                                                                                            |
|                                  | Population                              |                                                                                | N                                                                                                                                      |
|                                  | ISS                                     |                                                                                | score                                                                                                                                  |
|                                  | Time to survey/ Follow up               |                                                                                | years                                                                                                                                  |

Version: 27-02-2024
